# Supplementary material
Source: PubMed Central journal article supplement (PMC5048569)
Supplement: NIHMS809925-supplement-2.pdf [file NIHMS809925-supplement-2.pdf]

**Supplementary Table 1.**

Number of Outliers Removed per Group

| Behavior or Region                                        | aCSF |          |           | CRF  |          |           |
|-----------------------------------------------------------|------|----------|-----------|------|----------|-----------|
|                                                           | Male | Diestrus | Proestrus | Male | Diestrus | Proestrus |
| Head shakes                                               | 0    | 1        | 1         | 0    | 1        | 0         |
| Burying                                                   | 0    | 0        | 0         | 1    | 0        | 0         |
| Grooming                                                  | 0    | 1        | 0         | 0    | 0        | 0         |
| Anterior Cingulate Cortex (ACC)                           | 0    | 0        | 1         | 1    | 0        | 0         |
| Prelimbic Cortex (PL)                                     | 1    | 1        | 0         | 0    | 0        | 1         |
| Infralimbic Cortex (IL)                                   | 1    | 0        | 0         | 0    | 0        | 0         |
| Nucleus Accumbens (NAc) Shell                             | 1    | 0        | 0         | 1    | 0        | 0         |
| Nucleus Accumbens (Nac) Core                              | 1    | 0        | 0         | 0    | 0        | 0         |
| Lateral Septum (LS)                                       | 1    | 1        | 0         | 0    | 0        | 1         |
| Medial Septum (MS)                                        | 1    | 1        | 0         | 0    | 0        | 1         |
| anterodorsal Bed Nucleus of the Stria Terminalis (adBNST) | 0    | 1        | 0         | 0    | 0        | 0         |
| oval nucleus Bed Nucleus of the Stria Terminalis (oBNST)  | 0    | 0        | 0         | 0    | 0        | 0         |
| Basal Nucleus of Meynert (BN)                             | 1    | 0        | 0         | 0    | 1        | 0         |
| Paraventricular Nucleus (PVN)                             | 0    | 0        | 0         | 0    | 0        | 0         |
| Central Amygdala (CeA)                                    | 1    | 0        | 1         | 1    | 0        | 0         |
| Basolateral Amygdala (BLA)                                | 0    | 1        | 0         | 1    | 0        | 0         |
| Hippocampus (HPC)                                         | 0    | 0        | 0         | 0    | 0        | 0         |
| dorsomedial Periaqueductal Gray (dmPAG)                   | 0    | 0        | 0         | 1    | 0        | 0         |
| lateral subdivisions of the Periaqueductal Gray (lPAG)    | 0    | 1        | 0         | 1    | 0        | 1         |
| Pedunculopontine Tegmental Nucleus (PPTg)                 | 0    | 1        | 1         | 1    | 0        | 1         |
| ventromedial Dorsal Raphe (vmDR)                          | 0    | 1        | 0         | 1    | 0        | 0         |
| lateral wing Dorsal Raphe (lwDR)                          | 0    | 0        | 0         | 0    | 0        | 0         |
| Laterodorsal Tegmental Nucleus (LDTg)                     | 0    | 0        | 1         | 1    | 0        | 0         |
| Locus Coeruleus (LC)                                      | 1    | 1        | 0         | 0    | 0        | 0         |

Supplementary Table 2

| Brain Region<br>Correlated with<br>Grooming | Correlations |              |          |         |         |              | Correlation Comparisons |              |                    |              |                        |              |
|---------------------------------------------|--------------|--------------|----------|---------|---------|--------------|-------------------------|--------------|--------------------|--------------|------------------------|--------------|
|                                             | Males        |              | Diestrus |         | Females |              | Male vs. Diestrus       |              | Male vs. Proestrus |              | Diestrus vs. Proestrus |              |
|                                             | r-value      | p-value      | r-value  | p-value | r-value | p-value      | z-score                 | p-value      | z-score            | p-value      | z-score                | p-value      |
| ACC                                         | -0.320       | 0.401        | -0.160   | 0.706   | 0.144   | 0.733        | -0.282                  | 0.778        | -0.788             | 0.431        | -0.484                 | 0.628        |
| PL                                          | -0.408       | 0.213        | -0.670   | 0.145   | 0.199   | 0.705        | 0.558                   | 0.577        | -0.938             | 0.348        | -1.241                 | 0.215        |
| IL                                          | -0.351       | 0.289        | -0.635   | 0.176   | 0.848   | <b>0.016</b> | 0.564                   | 0.573        | -2.639             | <b>0.008</b> | -2.616                 | <b>0.009</b> |
| NAc Shell                                   | -0.292       | 0.412        | -0.109   | 0.780   | 0.541   | 0.133        | -0.344                  | 0.731        | -1.630             | 0.103        | -1.239                 | 0.215        |
| NAc Core                                    | -0.359       | 0.278        | 0.205    | 0.597   | 0.662   | 0.052        | -1.080                  | 0.280        | -2.171             | <b>0.030</b> | -1.020                 | 0.308        |
| LS                                          | 0.367        | 0.240        | 0.218    | 0.573   | -0.482  | 0.189        | 0.310                   | 0.756        | 1.727              | 0.084        | 1.293                  | 0.196        |
| MS                                          | 0.350        | 0.264        | 0.079    | 0.852   | -0.149  | 0.725        | 0.514                   | 0.607        | 0.925              | 0.355        | 0.363                  | 0.717        |
| adBNST                                      | -0.260       | 0.573        | -0.093   | 0.843   | 0.098   | 0.802        | -0.246                  | 0.806        | -0.565             | 0.572        | -0.296                 | 0.767        |
| oBNST                                       | 0.133        | 0.831        | -0.683   | 0.134   | 0.428   | 0.338        | 1.062                   | 0.288        | -0.373             | 0.709        | -1.692                 | 0.091        |
| BN                                          | 0.582        | 0.060        | -0.213   | 0.582   | 0.395   | 0.229        | 1.634                   | 0.102        | 0.496              | 0.620        | -1.175                 | 0.240        |
| PVN                                         | -0.572       | 0.052        | -0.023   | 0.949   | 0.517   | 0.189        | -1.245                  | 0.213        | -2.194             | <b>0.028</b> | -1.018                 | 0.309        |
| CeA                                         | -0.273       | 0.390        | 0.379    | 0.280   | -0.200  | 0.555        | -1.348                  | 0.178        | -0.159             | 0.874        | 1.164                  | 0.244        |
| BLA                                         | -0.579       | <b>0.049</b> | 0.347    | 0.327   | -0.059  | 0.863        | -2.029                  | <b>0.042</b> | -1.239             | 0.215        | 0.813                  | 0.416        |
| HPC                                         | 0.120        | 0.778        | -0.341   | 0.574   | 0.162   | 0.729        | 0.569                   | 0.570        | -0.064             | 0.949        | -0.599                 | 0.549        |
| dmPAG                                       | -0.459       | 0.182        | -0.093   | 0.843   | 0.632   | 0.068        | -0.643                  | 0.520        | -2.232             | <b>0.026</b> | -1.299                 | 0.194        |
| IPAG                                        | -0.020       | 0.959        | -0.050   | 0.915   | 0.716   | <b>0.030</b> | 0.047                   | 0.963        | -1.592             | 0.111        | -1.471                 | 0.141        |
| vmDR                                        | -0.069       | 0.850        | -0.262   | 0.570   | 0.058   | 0.892        | 0.318                   | 0.750        | -0.217             | 0.828        | -0.487                 | 0.626        |
| LDTg                                        | -0.275       | 0.414        | -0.405   | 0.320   | 0.590   | 0.095        | 0.258                   | 0.796        | -1.776             | 0.076        | -1.827                 | 0.068        |
| LC                                          | -0.068       | 0.843        | 0.202    | 0.665   | -0.009  | 0.984        | -0.445                  | 0.656        | -0.104             | 0.917        | 0.318                  | 0.751        |







Supplementary Table 6

| z-scores comparing CRF-treated males vs. diestrus females |                    | PL             | IL              | NAc Shell       | NAc Core        | LS              | MS              | adBNST          | oBNST           | BN              | PVN             | CeA             | BLA                          | HPC             | dmPAG           | IPAG            | vmDR            | LDTg                        | LC              |
|-----------------------------------------------------------|--------------------|----------------|-----------------|-----------------|-----------------|-----------------|-----------------|-----------------|-----------------|-----------------|-----------------|-----------------|------------------------------|-----------------|-----------------|-----------------|-----------------|-----------------------------|-----------------|
| ACC                                                       | z-score<br>p-value | 0.492<br>0.622 | -0.052<br>0.959 | -0.224<br>0.823 | 0.652<br>0.514  | -0.107<br>0.915 | 1.222<br>0.222  | 0.139<br>0.889  | 0.120<br>0.904  | 0.387<br>0.699  | -0.641<br>0.521 | 0.320<br>0.749  | 0.161<br>0.872               | -0.685<br>0.493 | -0.799<br>0.424 | -1.471<br>0.141 | 0.222<br>0.824  | -1.828<br>0.068             | -0.680<br>0.497 |
| PL                                                        | z-score<br>p-value |                | 1.252<br>0.211  | 0.454<br>0.650  | 0.666<br>0.505  | 0.735<br>0.462  | 1.115<br>0.265  | 1.015<br>0.310  | -1.258<br>0.208 | 0.197<br>0.844  | 0.324<br>0.746  | 1.157<br>0.247  | 0.643<br>0.520               | 0.901<br>0.367  | -0.868<br>0.386 | -1.112<br>0.266 | -0.450<br>0.653 | 0.802<br>0.422              | 0.872<br>0.383  |
| IL                                                        | z-score<br>p-value |                |                 | 0.852<br>0.394  | 0.693<br>0.489  | 0.527<br>0.598  | 0.498<br>0.618  | 0.828<br>0.408  | -1.038<br>0.299 | 0.603<br>0.547  | 1.259<br>0.208  | 0.486<br>0.627  | 0.551<br>0.581               | 1.911<br>0.056  | -0.149<br>0.882 | -0.505<br>0.614 | 0.136<br>0.891  | 0.586<br>0.558              | 0.878<br>0.380  |
| NAc Shell                                                 | z-score<br>p-value |                |                 |                 | -0.226<br>0.821 | 1.337<br>0.181  | 1.186<br>0.236  | 1.809<br>0.070  | -0.545<br>0.586 | 0.223<br>0.824  | 0.697<br>0.486  | 0.870<br>0.384  | -0.434<br>0.665              | 0.409<br>0.683  | -1.487<br>0.137 | -0.577<br>0.564 | 0.155<br>0.877  | 1.037<br>0.300              | 0.149<br>0.881  |
| NAc Core                                                  | z-score<br>p-value |                |                 |                 |                 | -0.033<br>0.974 | -0.885<br>0.376 | -0.788<br>0.431 | -0.845<br>0.398 | -1.180<br>0.238 | 0.785<br>0.432  | -0.425<br>0.671 | -0.312<br>0.755              | -0.005<br>0.996 | 0.556<br>0.578  | 1.782<br>0.075  | 1.170<br>0.242  | 0.342<br>0.733              | 0.227<br>0.820  |
| LS                                                        | z-score<br>p-value |                |                 |                 |                 |                 | -0.553<br>0.580 | -1.040<br>0.298 | 0.346<br>0.730  | 1.329<br>0.184  | 2.024<br>0.043  | -2.598<br>0.009 | -1.986<br>0.047              | -0.631<br>0.528 | 0.446<br>0.655  | 0.377<br>0.706  | 1.709<br>0.087  | 0.932<br>0.351              | -0.071<br>0.943 |
| MS                                                        | z-score<br>p-value |                |                 |                 |                 |                 |                 | -1.040<br>0.298 | -0.135<br>0.893 | 0.559<br>0.576  | 1.597<br>0.110  | -1.542<br>0.123 | -0.758<br>0.448              | -0.514<br>0.607 | 1.274<br>0.203  | 0.038<br>0.970  | 2.367<br>0.018  | -0.307<br>0.759             | -0.242<br>0.809 |
| adBNST                                                    | z-score<br>p-value |                |                 |                 |                 |                 |                 |                 | -1.229<br>0.219 | -0.610<br>0.542 | 2.865<br>0.004  | -1.412<br>0.158 | 0.119<br>0.905               | -0.338<br>0.735 | 1.473<br>0.141  | -0.080<br>0.936 | 1.524<br>0.128  | 1.256<br>0.209              | 0.204<br>0.838  |
| oBNST                                                     | z-score<br>p-value |                |                 |                 |                 |                 |                 |                 |                 | -0.382<br>0.702 | -0.476<br>0.634 | 1.424<br>0.155  | -0.792 <sup>a</sup><br>0.429 |                 | -0.149<br>0.882 | 0.923<br>0.356  | 0.024<br>0.981  | -0.751<br>0.453             | 0.112<br>0.911  |
| BN                                                        | z-score<br>p-value |                |                 |                 |                 |                 |                 |                 |                 |                 | 0.081<br>0.935  | -0.253<br>0.800 | 0.369<br>0.712               | -0.968<br>0.333 | -0.133<br>0.894 | 0.522<br>0.602  | -0.562<br>0.574 | -0.209<br>0.834             | -0.283<br>0.777 |
| PVN                                                       | z-score<br>p-value |                |                 |                 |                 |                 |                 |                 |                 |                 |                 | 1.556<br>0.120  | -0.080<br>0.936              | 1.479<br>0.139  | 0.040<br>0.968  | -0.733<br>0.464 | -1.144<br>0.253 | 1.886<br>0.059              | 1.360<br>0.174  |
| CeA                                                       | z-score<br>p-value |                |                 |                 |                 |                 |                 |                 |                 |                 |                 |                 | -0.938<br>0.348              | -2.027<br>0.043 | -0.446<br>0.655 | -0.491<br>0.623 | 0.846<br>0.398  | 0.170<br>0.865              | -0.706<br>0.480 |
| BLA                                                       | z-score<br>p-value |                |                 |                 |                 |                 |                 |                 |                 |                 |                 |                 |                              | -0.849<br>0.396 | 0.022<br>0.983  | -1.107<br>0.268 | 1.400<br>0.161  | 0.462<br>0.644              | 0.379<br>0.705  |
| HPC                                                       | z-score<br>p-value |                |                 |                 |                 |                 |                 |                 |                 |                 |                 |                 |                              |                 | 0.860<br>0.390  | 0.614<br>0.539  | 0.007<br>0.994  | 0.267 <sup>a</sup><br>0.790 |                 |
| dmPAG                                                     | z-score<br>p-value |                |                 |                 |                 |                 |                 |                 |                 |                 |                 |                 |                              |                 |                 | -0.342<br>0.732 | -0.651<br>0.515 | 0.848<br>0.397              | -0.098<br>0.922 |
| IPAG                                                      | z-score<br>p-value |                |                 |                 |                 |                 |                 |                 |                 |                 |                 |                 |                              |                 |                 |                 | -1.294<br>0.196 | 0.472<br>0.637              | 0.817<br>0.414  |
| vmDR                                                      | z-score<br>p-value |                |                 |                 |                 |                 |                 |                 |                 |                 |                 |                 |                              |                 |                 |                 |                 | 0.068<br>0.946              | -1.702<br>0.089 |
| LDTg                                                      | z-score<br>p-value |                |                 |                 |                 |                 |                 |                 |                 |                 |                 |                 |                              |                 |                 |                 |                 |                             | 0.221<br>0.825  |

<sup>a</sup> Insufficient data for analysis

Supplementary Table 7

| Z-scores comparing CRF-treated males vs. proestrus females |                    | PL             | IL              | Nac Shell       | Nac Core        | LS              | MS              | adBNST          | oBNST           | BN              | PVN             | CeA             | BLA                          | HPC             | dmPAG           | IPAG                         | vmDR            | LDTg            | LC              |
|------------------------------------------------------------|--------------------|----------------|-----------------|-----------------|-----------------|-----------------|-----------------|-----------------|-----------------|-----------------|-----------------|-----------------|------------------------------|-----------------|-----------------|------------------------------|-----------------|-----------------|-----------------|
| ACC                                                        | z-score<br>p-value | 1.291<br>0.197 | -0.055<br>0.956 | -1.296<br>0.195 | -1.187<br>0.235 | -0.120<br>0.905 | -1.184<br>0.236 | -1.300<br>0.193 | 0.444<br>0.657  | -0.833<br>0.405 | 0.670<br>0.503  | -0.187<br>0.851 | -0.498<br>0.618              | -0.333<br>0.739 | -0.345<br>0.730 | -1.642<br>0.101              | -0.513<br>0.608 | -0.956<br>0.339 | -1.276<br>0.202 |
| PL                                                         | z-score<br>p-value |                | 2.340<br>0.019  | 3.276<br>0.001  | 1.267<br>0.205  | 0.653<br>0.513  | 1.018<br>0.309  | 2.125<br>0.034  | -1.082<br>0.279 | -0.754<br>0.451 | -0.463<br>0.643 | 0.038<br>0.970  | 2.347<br>0.019               | -0.406<br>0.685 | -0.367<br>0.713 | -1.269 <sup>a</sup><br>0.204 |                 | -0.335<br>0.737 | -0.275<br>0.783 |
| IL                                                         | z-score<br>p-value |                |                 | 0.434<br>0.664  | -0.705<br>0.481 | 1.652<br>0.098  | 0.267<br>0.790  | 1.058<br>0.290  | -1.697<br>0.090 | -2.367<br>0.018 | 0.783<br>0.434  | -1.653<br>0.098 | 0.543<br>0.587               | -0.554<br>0.580 | -1.255<br>0.210 | -1.929<br>0.054              | -0.094<br>0.925 | -0.683<br>0.495 | -0.262<br>0.794 |
| Nac Shell                                                  | z-score<br>p-value |                |                 |                 | -1.084<br>0.278 | 1.438<br>0.150  | 0.189<br>0.850  | -0.266<br>0.790 | -0.229<br>0.819 | -0.107<br>0.915 | 0.728<br>0.466  | 0.548<br>0.584  | -1.092<br>0.275              | -0.128<br>0.898 | -1.133<br>0.257 | -2.088<br>0.037              | -0.700<br>0.484 | -0.222<br>0.824 | -0.941<br>0.347 |
| Nac Core                                                   | z-score<br>p-value |                |                 |                 |                 | 0.577<br>0.564  | -0.289<br>0.772 | -1.296<br>0.195 | -0.413<br>0.680 | -0.727<br>0.467 | 0.606<br>0.544  | 0.091<br>0.927  | -0.655<br>0.513              | 0.180<br>0.857  | -0.709<br>0.479 | -1.305<br>0.192              | 0.246<br>0.806  | -0.094<br>0.925 | -0.314<br>0.753 |
| LS                                                         | z-score<br>p-value |                |                 |                 |                 |                 | 0.293<br>0.769  | 0.078<br>0.937  | 0.115<br>0.909  | 1.278<br>0.201  | 0.519<br>0.604  | 0.930<br>0.352  | -0.636<br>0.524              | 0.623<br>0.533  | 1.482<br>0.138  | 1.411<br>0.158               | 0.633<br>0.527  | 1.084<br>0.824  | 0.222<br>0.824  |
| MS                                                         | z-score<br>p-value |                |                 |                 |                 |                 |                 | -0.677<br>0.498 | -0.039<br>0.969 | 0.311<br>0.756  | 0.864<br>0.388  | -0.431<br>0.666 | -1.607<br>0.108              | 0.719<br>0.472  | 0.918<br>0.358  | -0.478<br>0.633              | -0.320<br>0.749 | 0.163<br>0.870  | -0.545<br>0.586 |
| adBNST                                                     | z-score<br>p-value |                |                 |                 |                 |                 |                 |                 | -0.948<br>0.343 | -0.811<br>0.417 | 2.804<br>0.005  | -1.133<br>0.257 | -0.709<br>0.478              | -0.720<br>0.472 | 0.088<br>0.930  | -1.520<br>0.128              | 0.549<br>0.583  | 1.394<br>0.163  | -1.545<br>0.122 |
| oBNST                                                      | z-score<br>p-value |                |                 |                 |                 |                 |                 |                 |                 | -0.891<br>0.373 | -0.175<br>0.861 | 0.580<br>0.562  | -0.866 <sup>a</sup><br>0.386 |                 | -0.994<br>0.320 | -0.649<br>0.516              | 0.210<br>0.834  | -1.379<br>0.168 | -0.962<br>0.336 |
| BN                                                         | z-score<br>p-value |                |                 |                 |                 |                 |                 |                 |                 |                 | -0.126<br>0.900 | -0.556<br>0.578 | 0.142<br>0.887               | -0.821<br>0.412 | -1.040<br>0.298 | -0.573<br>0.567              | -0.380<br>0.704 | -1.381<br>0.167 | -0.288<br>0.774 |
| PVN                                                        | z-score<br>p-value |                |                 |                 |                 |                 |                 |                 |                 |                 |                 | 0.862<br>0.388  | 0.652<br>0.514               | 1.891<br>0.059  | 0.673<br>0.430  | -0.789<br>0.430              | -0.679<br>0.497 | 0.767<br>0.443  | 0.555<br>0.579  |
| CeA                                                        | z-score<br>p-value |                |                 |                 |                 |                 |                 |                 |                 |                 |                 |                 | -0.242<br>0.809              | -2.762<br>0.006 | -2.297<br>0.022 | -0.801<br>0.423              | -0.156<br>0.876 | -0.577<br>0.564 | -0.854<br>0.393 |
| BLA                                                        | z-score<br>p-value |                |                 |                 |                 |                 |                 |                 |                 |                 |                 |                 |                              | -0.431<br>0.667 | -0.114<br>0.909 | -1.031<br>0.303              | -0.403<br>0.687 | 0.081<br>0.936  | -1.716<br>0.086 |
| HPC                                                        | z-score<br>p-value |                |                 |                 |                 |                 |                 |                 |                 |                 |                 |                 |                              |                 | -0.231<br>0.817 | -0.303<br>0.762              | -0.499<br>0.618 | 0.448<br>0.654  | 0.033<br>0.973  |
| dmPAG                                                      | z-score<br>p-value |                |                 |                 |                 |                 |                 |                 |                 |                 |                 |                 |                              |                 |                 | -1.342<br>0.180              | -0.030<br>0.976 | 0.361<br>0.718  | -0.567<br>0.570 |
| IPAG                                                       | z-score<br>p-value |                |                 |                 |                 |                 |                 |                 |                 |                 |                 |                 |                              |                 |                 |                              | -1.833<br>0.067 | -2.104<br>0.035 | -0.673<br>0.501 |
| vmDR                                                       | z-score<br>p-value |                |                 |                 |                 |                 |                 |                 |                 |                 |                 |                 |                              |                 |                 |                              |                 | -1.381<br>0.167 | -2.871<br>0.004 |
| LDTg                                                       | z-score<br>p-value |                |                 |                 |                 |                 |                 |                 |                 |                 |                 |                 |                              |                 |                 |                              |                 |                 | -0.384<br>0.701 |

<sup>a</sup> Insufficient data for analysis

Supplementary Table 8

| Z-scores comparing CRF-treated diestrus vs. proestrus females |                    | PL             | IL             | NAc Shell       | NAc Core        | LS              | MS              | adBNST          | oBNST           | BN              | PVN             | CeA             | BLA             | HPC             | dmPAG           | IPAG            | vmDR                | LDTg                        | LC              |
|---------------------------------------------------------------|--------------------|----------------|----------------|-----------------|-----------------|-----------------|-----------------|-----------------|-----------------|-----------------|-----------------|-----------------|-----------------|-----------------|-----------------|-----------------|---------------------|-----------------------------|-----------------|
| ACC                                                           | z-score<br>p-value | 0.747<br>0.455 | 0.001<br>0.999 | -1.017<br>0.309 | -1.679<br>0.093 | -0.027<br>0.978 | -2.242<br>0.025 | -1.293<br>0.196 | 0.324<br>0.746  | -1.294<br>0.196 | 1.224<br>0.221  | -0.507<br>0.612 | -0.659<br>0.510 | 0.352<br>0.725  | 0.372<br>0.710  | -0.280<br>0.780 | -0.668<br>0.504     | 0.692<br>0.489              | -0.558<br>0.577 |
| PL                                                            | z-score<br>p-value |                | 0.902<br>0.367 | 2.578<br>0.010  | 0.617<br>0.537  | 0.169<br>0.866  | 0.055<br>0.956  | 0.488<br>0.626  | 0.176<br>0.860  | -0.824<br>0.410 | -0.665<br>0.506 | -0.928<br>0.353 | 1.440<br>0.150  | -1.034<br>0.301 | 0.264<br>0.791  | 0.264<br>0.707  | -0.376 <sup>a</sup> | -0.830<br>0.406             | -0.868<br>0.386 |
| IL                                                            | z-score<br>p-value |                |                | -0.362<br>0.718 | -1.211<br>0.226 | 1.040<br>0.298  | -0.192<br>0.848 | -0.079<br>0.937 | -0.659<br>0.510 | -2.558<br>0.011 | -0.495<br>0.621 | -1.756<br>0.079 | -0.053<br>0.958 | -1.948<br>0.051 | -0.925<br>0.355 | -1.192<br>0.233 | -0.177<br>0.859     | -1.036<br>0.300             | -0.938<br>0.348 |
| NAc Shell                                                     | z-score<br>p-value |                |                |                 | -0.826<br>0.409 | 0.177<br>0.859  | -0.910<br>0.363 | -2.075<br>0.038 | 0.295<br>0.768  | -0.339<br>0.735 | 0.107<br>0.915  | -0.311<br>0.756 | -0.658<br>0.511 | -0.465<br>0.642 | 0.420<br>0.675  | -1.230<br>0.219 | -0.765<br>0.444     | -1.150<br>0.250             | -0.933<br>0.351 |
| NAc Core                                                      | z-score<br>p-value |                |                |                 |                 | 0.568<br>0.570  | 0.528<br>0.597  | -0.508<br>0.611 | 0.393<br>0.695  | 0.487<br>0.626  | -0.082<br>0.935 | 0.497<br>0.619  | -0.330<br>0.741 | 0.160<br>0.873  | -1.084<br>0.278 | -2.754<br>0.006 | -0.801<br>0.423     | -0.387<br>0.699             | -0.476<br>0.634 |
| LS                                                            | z-score<br>p-value |                |                |                 |                 |                 | 0.723<br>0.470  | 1.190<br>0.234  | -0.319<br>0.750 | -0.111<br>0.912 | -1.049<br>0.294 | 3.300<br>0.001  | 1.262<br>0.207  | 1.120<br>0.263  | 0.908<br>0.364  | 0.953<br>0.340  | -1.073<br>0.283     | 0.075<br>0.940              | 0.247<br>0.805  |
| MS                                                            | z-score<br>p-value |                |                |                 |                 |                 |                 | 0.435<br>0.664  | 0.117<br>0.907  | -0.230<br>0.818 | -0.569<br>0.569 | 1.001<br>0.317  | -0.765<br>0.444 | 1.020<br>0.308  | -0.226<br>0.821 | -0.490<br>0.624 | -2.297<br>0.022     | 0.400<br>0.689              | -0.256<br>0.798 |
| adBNST                                                        | z-score<br>p-value |                |                |                 |                 |                 |                 |                 | 0.393<br>0.694  | -0.106<br>0.915 | 0.152<br>0.879  | 0.414<br>0.679  | -0.918<br>0.359 | -0.187<br>0.851 | -1.417<br>0.156 | -0.956<br>0.339 | -1.136<br>0.256     | -0.118<br>0.906             | -1.487<br>0.137 |
| oBNST                                                         | z-score<br>p-value |                |                |                 |                 |                 |                 |                 |                 | -0.553<br>0.580 | 0.190<br>0.849  | -1.044<br>0.297 | -0.072<br>0.943 | 0.277<br>0.782  | -0.628<br>0.530 | -1.779<br>0.075 | 0.140<br>0.888      | -0.556<br>0.578             | -1.074<br>0.283 |
| BN                                                            | z-score<br>p-value |                |                |                 |                 |                 |                 |                 |                 |                 | -0.196<br>0.845 | -0.272<br>0.786 | -0.244<br>0.808 | 0.296<br>0.767  | -0.838<br>0.402 | -1.145<br>0.252 | 0.204<br>0.838      | -1.107<br>0.268             | 0.013<br>0.990  |
| PVN                                                           | z-score<br>p-value |                |                |                 |                 |                 |                 |                 |                 |                 |                 | -0.536<br>0.592 | 0.705<br>0.496  | 0.681<br>0.565  | 0.576<br>0.565  | -0.111<br>0.911 | 0.200<br>0.842      | -0.788<br>0.431             | -0.615<br>0.539 |
| CeA                                                           | z-score<br>p-value |                |                |                 |                 |                 |                 |                 |                 |                 |                 |                 | 0.705<br>0.481  | -0.181<br>0.856 | -1.609<br>0.108 | -0.225<br>0.822 | -0.955<br>0.340     | -0.695<br>0.487             | -0.081<br>0.936 |
| BLA                                                           | z-score<br>p-value |                |                |                 |                 |                 |                 |                 |                 |                 |                 |                 |                 | 0.487<br>0.626  | -0.123<br>0.902 | 0.183<br>0.855  | -1.711<br>0.087     | -0.372<br>0.710             | -1.852<br>0.064 |
| HPC                                                           | z-score<br>p-value |                |                |                 |                 |                 |                 |                 |                 |                 |                 |                 |                 |                 | -1.006<br>0.314 | -0.861<br>0.389 | -0.361<br>0.718     | 0.008 <sup>a</sup><br>0.994 |                 |
| dmPAG                                                         | z-score<br>p-value |                |                |                 |                 |                 |                 |                 |                 |                 |                 |                 |                 |                 |                 | -0.796<br>0.426 | 0.600<br>0.549      | -0.512<br>0.608             | -0.376<br>0.707 |
| IPAG                                                          | z-score<br>p-value |                |                |                 |                 |                 |                 |                 |                 |                 |                 |                 |                 |                 |                 |                 | -0.330<br>0.741     | -2.289<br>0.022             | -1.325<br>0.185 |
| vmDR                                                          | z-score<br>p-value |                |                |                 |                 |                 |                 |                 |                 |                 |                 |                 |                 |                 |                 |                 |                     | -1.311<br>0.190             | -0.851<br>0.395 |
| LDTg                                                          | z-score<br>p-value |                |                |                 |                 |                 |                 |                 |                 |                 |                 |                 |                 |                 |                 |                 |                     |                             | -0.542<br>0.588 |

<sup>a</sup> Insufficient data for analysis
